# Supplementary material for: Design of a selective solid acid catalyst for the optimization of glucose production from Oryza sativa straw
Source: Royal Society of Chemistry journal article supplement (doi:10.1039/c5ra20121g), 2015-12-15
Supplement: c5ra20121g1.pdf [file c5ra20121g1.pdf]

Electronic supplementary information:

***Design of selective solid acid catalyst for the optimization of glucose production from Oryza Sativa straw***

*Amudhavalli Victor<sup>a</sup>, Indra Neel Pulidindi<sup>a</sup>, Tae Hyun Kim<sup>b</sup>, Aharon Gedanken<sup>a, c\*</sup>*

<sup>a</sup>Department of Chemistry, Bar-Ilan University, Ramat-Gan 52900, Israel

<sup>b</sup>Department of Environmental Engineering, Kongju National University, Cheonan, Chungnam 330-717, Korea and

<sup>c</sup>National Cheng Kung University, Department of Materials Science and Engineering, Tainan 70101, Taiwan

*Tel: +972-3-5318315; Fax: +972-3-7384053;*

*\*E-mail: [gedanken@mail.biu.ac.il](mailto:gedanken@mail.biu.ac.il)*

**Table S1.** Composition of untreated and pretreated biomass (rice straw) <sup>a</sup>

| Description                        | S.R. <sup>b</sup> | Delignification | Solid     |            | Liquid   |          | Total     |            |
|------------------------------------|-------------------|-----------------|-----------|------------|----------|----------|-----------|------------|
|                                    |                   |                 | Glucan    | Xylan      | Glucan   | Xylan    | Glucan    | Xylan      |
|                                    | [%]               | [%]             | [%]       | [%]        | [%]      | [%]      | [%]       | [%]        |
| Untreated                          | -                 | -               | -         | -          | -        | -        | 30.6      | 14.4       |
| SAA <sup>c</sup>                   | 62.0 ±1.8         | 76.0 ±1.8       | 30.3 ±0.0 | 13.2 ± 0.2 | -        | -        | 30.3 ±0.0 | 13.2 ± 0.2 |
| SAA-hot water                      | 74.9 ±2.0         | 78.8 ±1.7       | 30.8 ±0.1 | 6.5 ±0.1   | 2.9 ±0.7 | 3.2 ±0.4 | 33.7 ±0.4 | 9.7 ±0.5   |
| SAA-H <sub>2</sub> SO <sub>4</sub> | 49.3 ±1.9         | 85.4 ±0.8       | 21.6 ±0.0 | 3.5 ±1.2   | 3.0 ±0.5 | 3.8 ±0.9 | 24.6 ±0.3 | 7.3 ±0.4   |

<sup>a</sup>All sugar and lignin content based on the oven-dry untreated biomass. Values are expressed as mean and standard deviation (n=2).

<sup>b</sup>S.R.: solid remaining after reaction.

<sup>c</sup>SAA: soaking in aqueous ammonia.

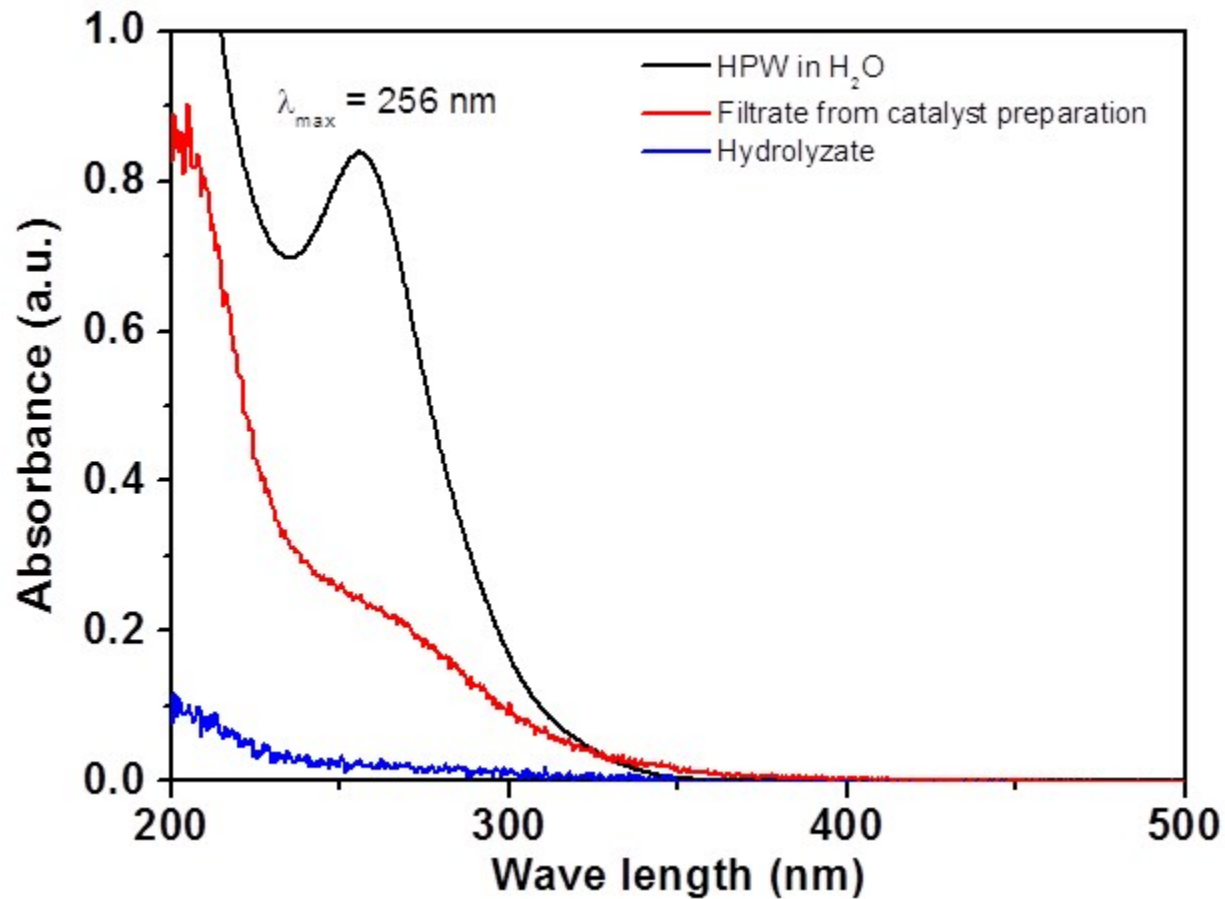

**Fig. S1.** UV-Vis spectra of aq. HPW, filtrate collected during catalyst preparation via impregnation method and the hydrolyzate obtained from rice straw hydrolysis under microwave irradiation (100 °C, 5 min.).

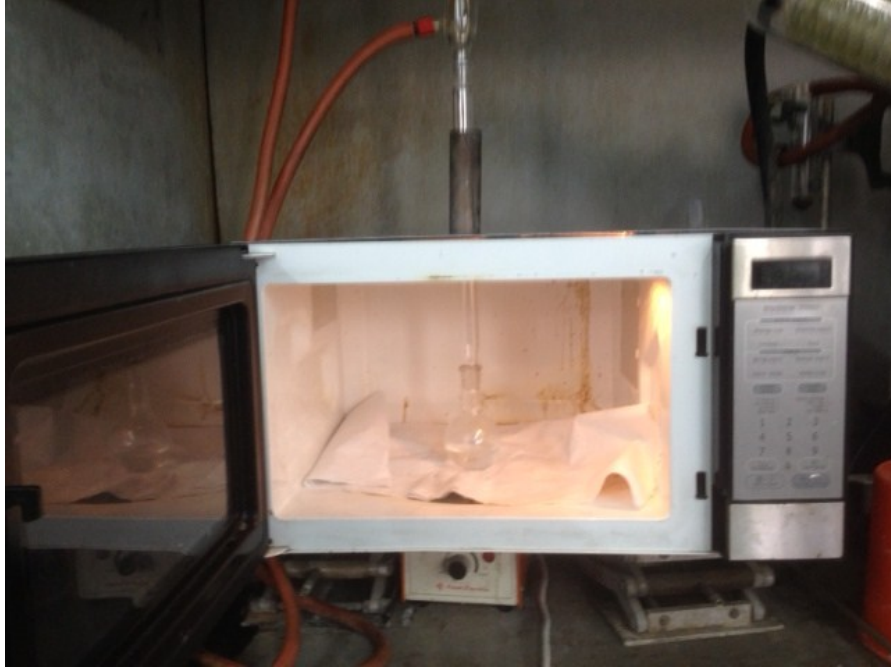

**Fig. S2.** Digital photograph of the modified domestic microwave oven (MDMWO) with stirring facility used for the hydrolysis of pretreated rice straw

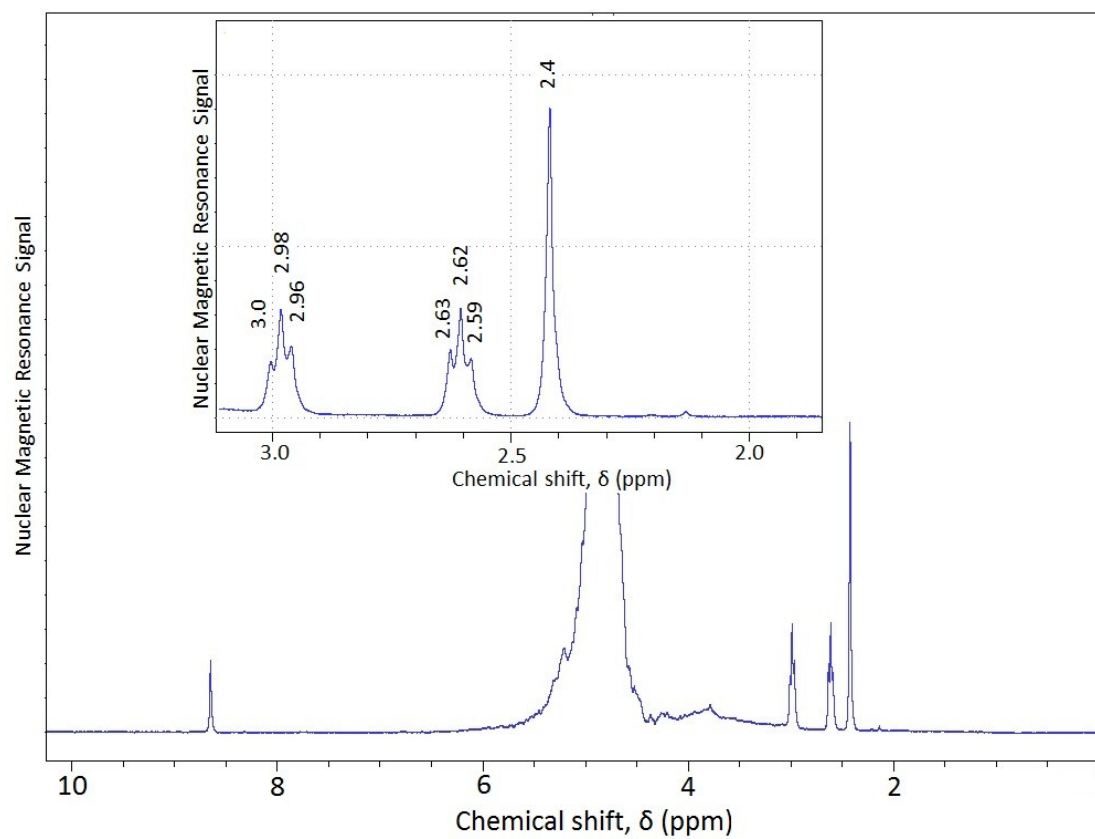

**Fig. S3.** <sup>1</sup>H NMR spectrum of the hydrolyzate from pretreated (aq. NH<sub>3</sub>-H<sub>2</sub>SO<sub>4</sub>) rice straw hydrolyzed in commercial microwave oven (MARS, 5 min., 100 °C, 3 M HCl)

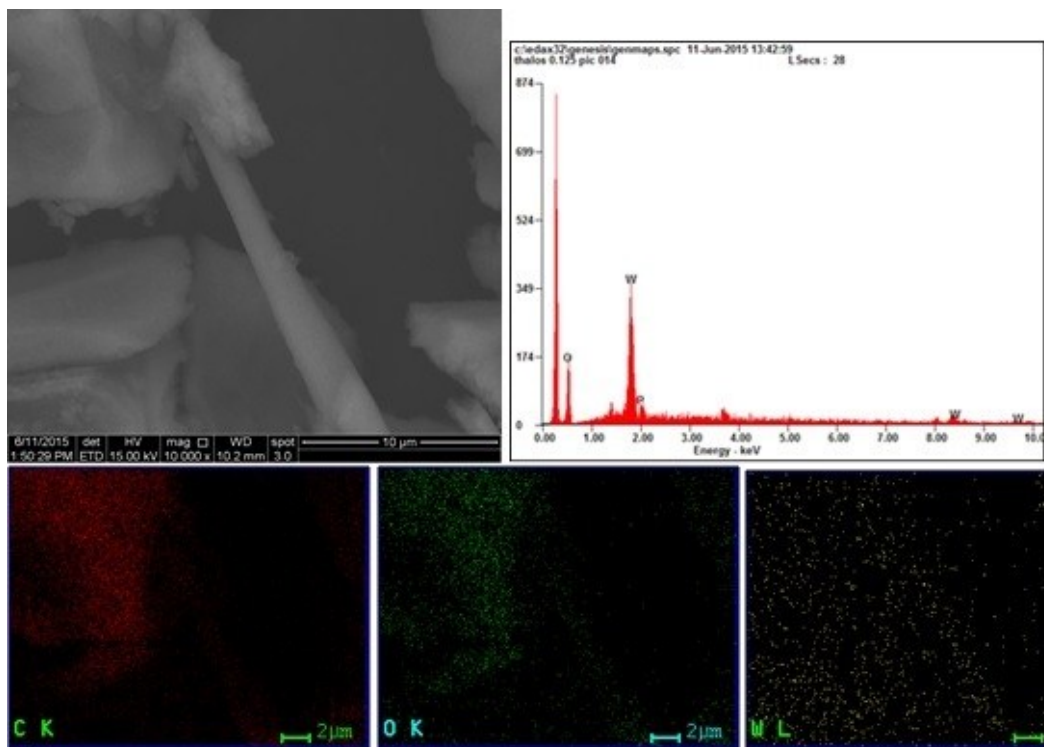

**Fig. S4.** E-SEM, EDAX and the elemental mapping (C, O, W) of ~ 40 wt.% HPW/AC spent catalyst
